# Supplementary material for: Binding of doxorubicin to Sorcin impairs cell death and increases drug resistance in cancer cells
Source: PubMed Central journal article supplement (PMC5550883; doi:10.1038/cddis.2017.342), 2017-07-20

**S1 Fig. Sorcin binds chemotherapeutic drugs *in vitro* directly and with high affinity.**

(A) SPR OneStep Experiment: Sorcin binds vinblastine, paclitaxel and doxorubicin directly and with high affinity; (B) SPR FastStep experiment: Sorcin binds cisplatin with high affinity.

A

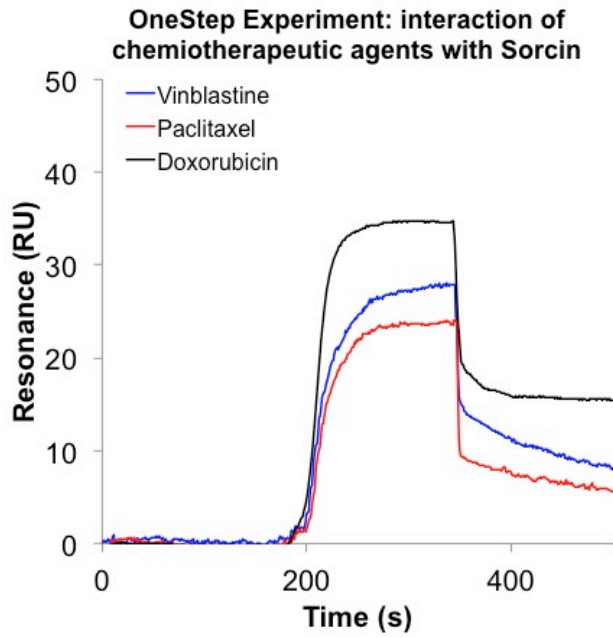

B

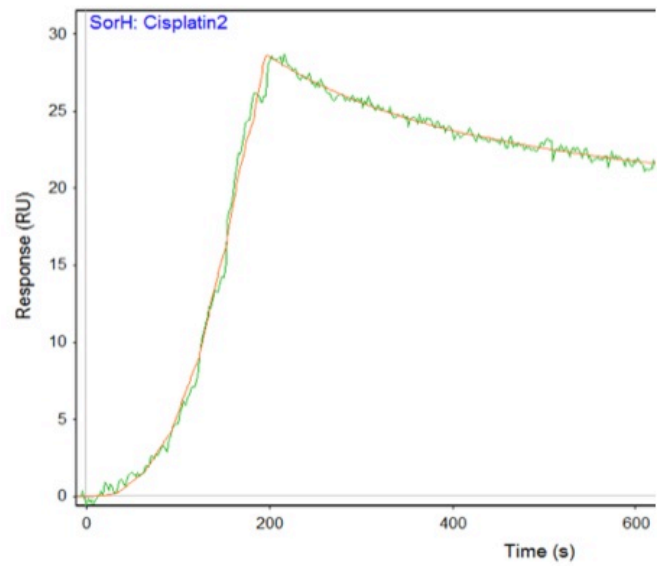

**S2 Fig. Sorcin binds doxorubicin with high affinity *in vitro*.** Doxorubicin binding to Sorcin monitored by (A) SPR titration experiments in the presence of 500  $\mu\text{M}$  EDTA and (B, C) fluorescence titration experiments in the presence of 1 mM (B) and 5 mM  $\text{MgCl}_2$ . Each protein was incubated for 3 minutes at 25°C in the presence of increasing concentration of ligand. Sorcin contains two binding sites for doxorubicin, with affinities in the nanomolar and low micromolar range.

| Sorcin-Doxorubicin                  | SPR                 |                     | Fluorescence        |                     |
|-------------------------------------|---------------------|---------------------|---------------------|---------------------|
|                                     | Site 1 ( $K_{D1}$ ) | Site 2 ( $K_{D2}$ ) | Site 1 ( $K_{D1}$ ) | Site 2 ( $K_{D2}$ ) |
| EDTA                                | 22 nM               | 2 $\mu\text{M}$     | $0.9 \pm 0.5$ nM    | $511 \pm 140$ nM    |
| + 500 $\mu\text{M}$ $\text{CaCl}_2$ | 10 nM               | 1 $\mu\text{M}$     |                     |                     |
| + 1 mM $\text{MgCl}_2$              |                     |                     | $1.2 \pm 2.7$ nM    | $360 \pm 950$ nM    |
| + 5 mM $\text{MgCl}_2$              |                     |                     | $0.9 \pm 1.2$ nM    | $318 \pm 280$ nM    |

A

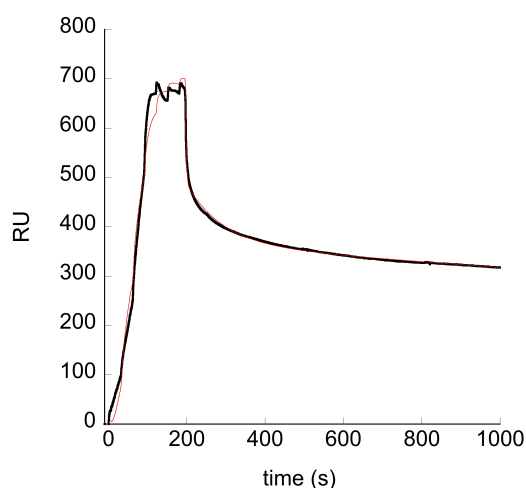

B

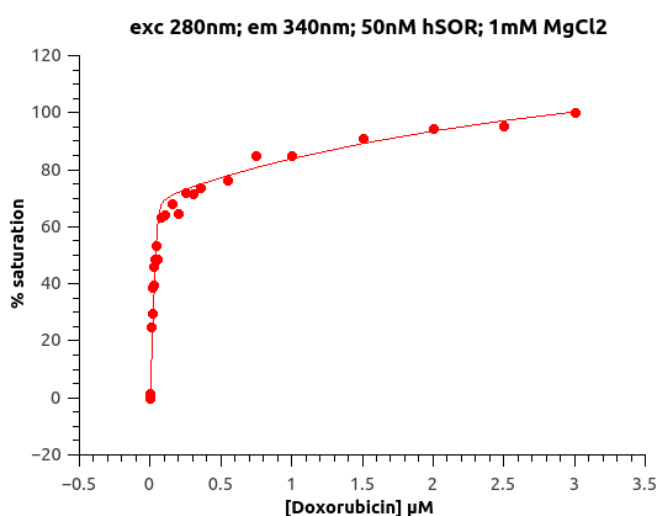

C

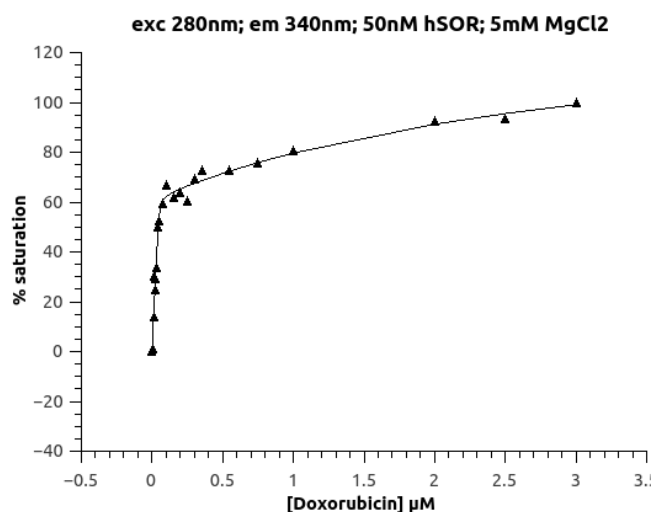

**S3 Fig. Emission spectra at 100K ( $\lambda_{\text{ex}} = 473 \text{ nm}$ ) of Sorcin crystals containing different amounts of doxorubicin.**

Changes in peaks intensity and a 25 nm red shift are likely due to doxorubicin stacking to aromatic residues or dimerization, once bound to Sorcin.

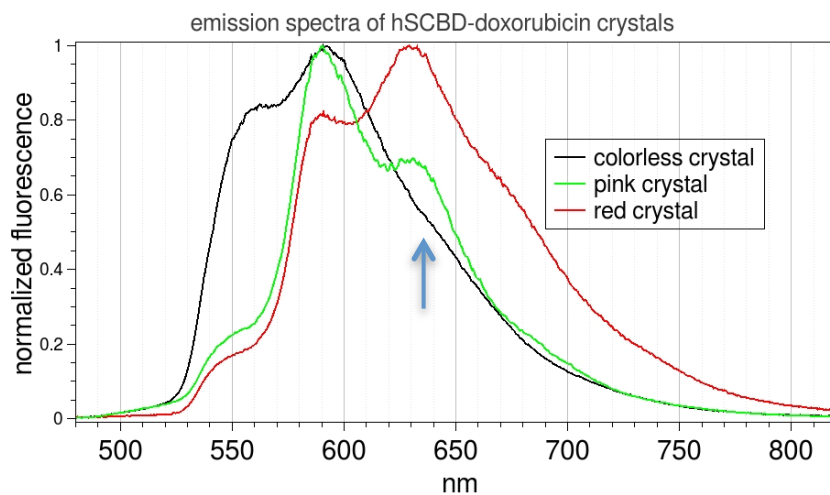

**S4 Fig.  $F_o-F_C$  omit maps of doxorubicin binding sites.**

(A)  $F_o-F_C$  omit map contoured at  $3\sigma$  (blue), calculated in the absence of doxorubicin, showing doxorubicin binding to EF5; the helices surrounding doxorubicin are indicated. (B) blow up of the  $F_o-F_C$  omit map contoured at  $3\sigma$ , showing the peak of density at pocket 2, at the interface between two dimers of the asymmetric unit.

A

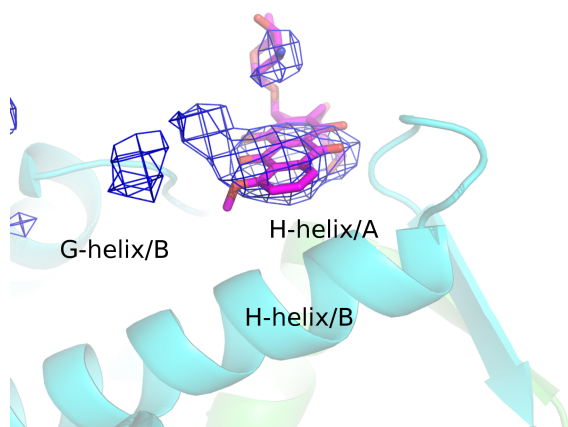

B

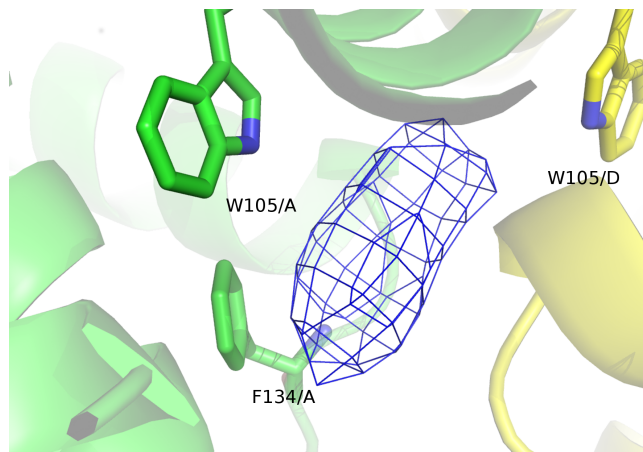



**S6 Fig. Experiments of Sytox Blue incorporation.**

Cell death percentage upon H1299 cells transfection with scrambled siRNA or Sorcin siRNA in control and 0.6  $\mu$ M 48 hours doxorubicin-treated cells.

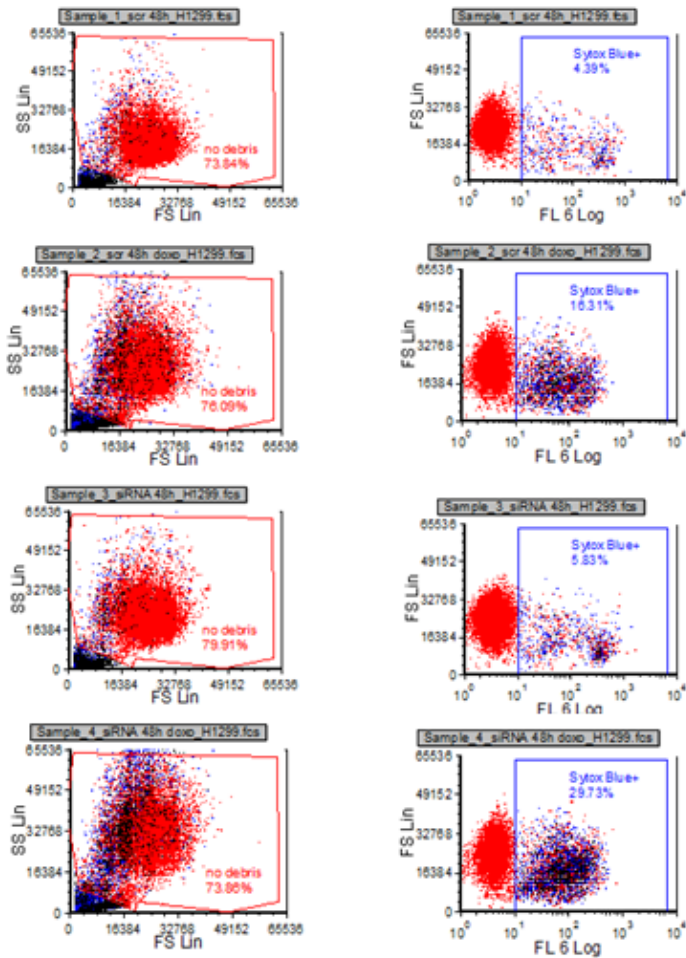

| Sample         | % SYTOX |
|----------------|---------|
| scr 48h        | 4.39    |
| siRNA 48h      | 5.83    |
| scr doxo 48h   | 16.31   |
| siRNA doxo 48h | 29.73   |

**S7 Fig. Cytofluorimetry experiments showing doxorubicin accumulation.**

Doxorubicin accumulation in H1299 cells upon Sorcin silencing (top) with respect to scrambled RNA (below), after 3 hour- (left) and 5-hour treatment (right).

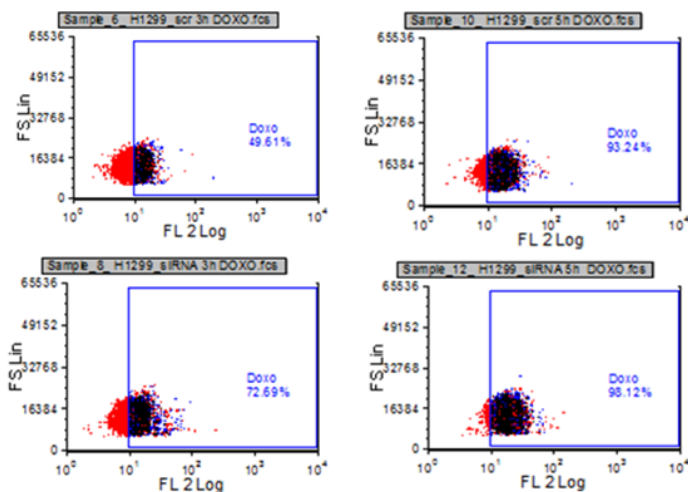

**S8 Fig. PARP cleavage experiment upon 48 hours 0.6  $\mu$ M doxorubicin treatment.** Western blot analysis showing that upon Sorcin silencing, there is a negligible cleavage of PARP, compared to the combination of Sorcin-directed-silencing and doxorubicin treatment (PARP FL: PARP full length; PARP CL: PARP cleaved).

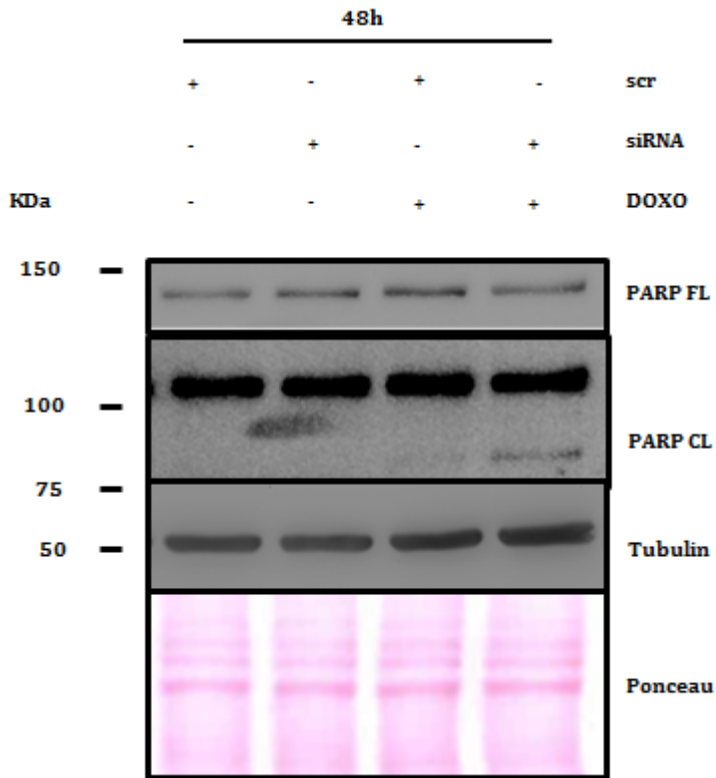

**S9 Fig. Sorcin silencing decreases MDR1 expression in H1299 cells.**

The experiment shows the incorporation of rhodamine123, in a time-course experiment performed at 37°C, (A) 30', (B) 1h, (C) 2h after incubation with the dye. Black and blue curves represent the non-treated cells (in the presence of scrambled siRNA and upon Sorcin silencing, respectively), while red and purple curves represent the cells treated with rhodamine123 (in the presence of scrambled siRNA and upon Sorcin silencing, respectively). The experiment shows that rhodamine123 content is increased upon Sorcin silencing, especially after 2h incubation.

A

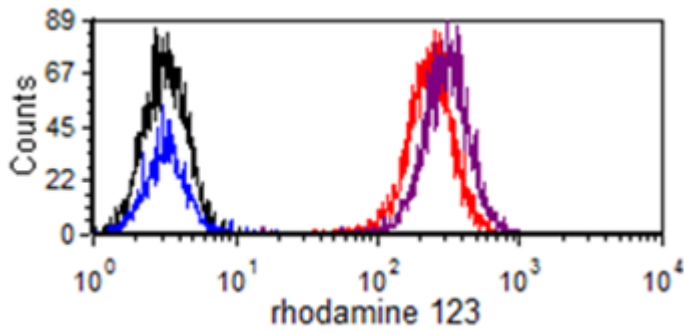

B

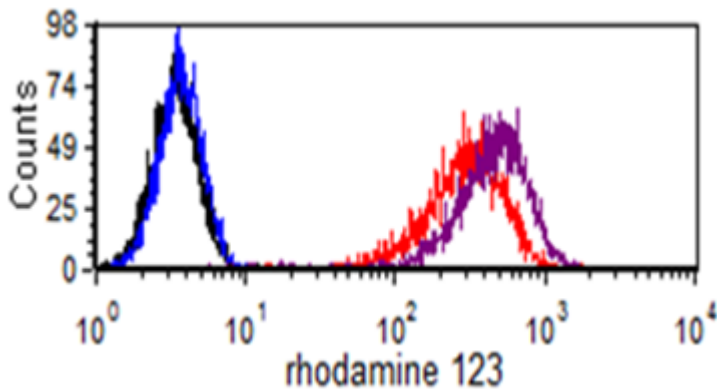

C

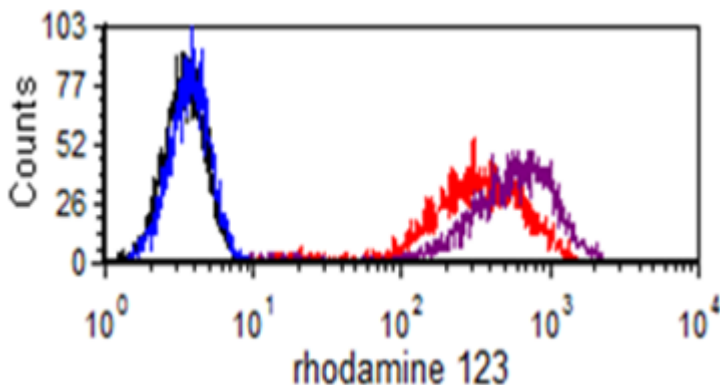

— Scr 37°  
— Scr 37° Rho123  
— siRNA 37°  
— siRNA 37° Rho123



**S10 Fig. Sorcin silencing decreases MDR1 expression in H1299 cells.**

Western blot experiment showing a decrease in MDR1 protein level upon Sorcin silencing, both 24h and at 48h after treatment with siRNA.

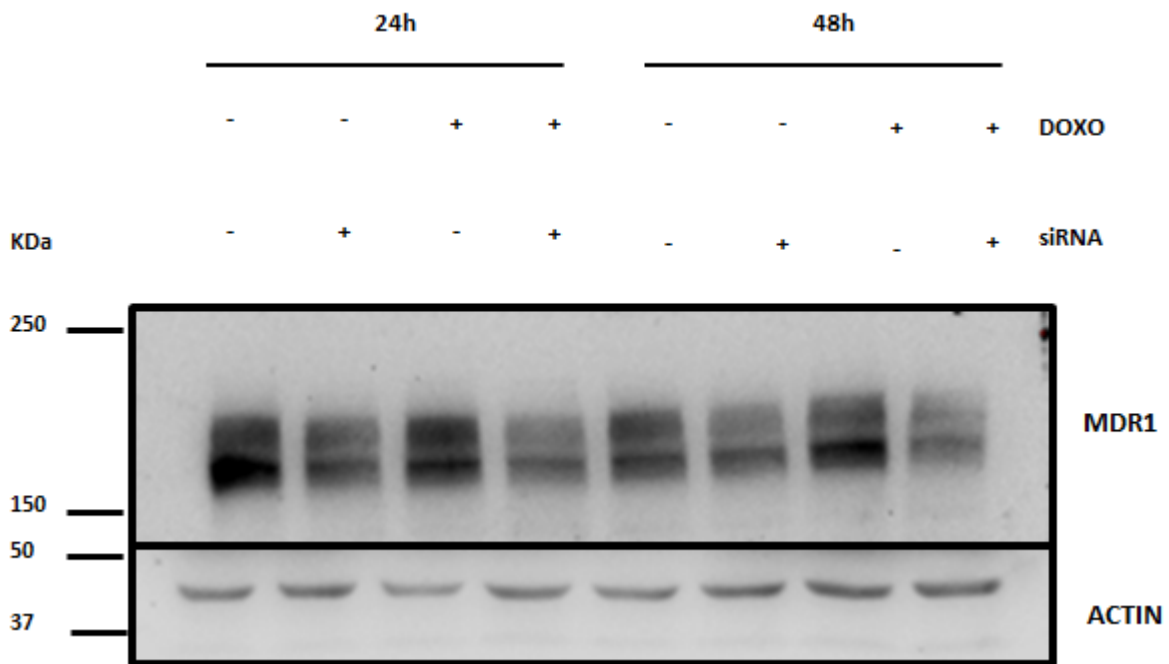

Supplement: cddis2017342x1.pdf [file cddis2017342x1.pdf]
